# Supplementary material for: Cerium Oxide Nanoparticles Regulate Insulin Sensitivity and Oxidative Markers in 3T3-L1 Adipocytes and C2C12 Myotubes
Source: Hindawi journal article supplement (doi:10.1155/2019/2695289), 2019-02-04
Supplement: f1 [file 2695289.f1.pdf]

## Supplementary Material

TABLE S1. Primer sequences for the quantitative PCR for the mouse genes analyzed. The gene identification number (ID) is the unique identifier number from the Entrez Global Query Cross-Database Search System at the National Center for Biotechnology Information.

| Gene symbol   | Gene name                                       | Entrez Gene ID | Sequence (5'→3')                                         | Product Size (bp) |
|---------------|-------------------------------------------------|----------------|----------------------------------------------------------|-------------------|
| <i>Adipoq</i> | adiponectin, C1Q and collagen domain containing | 11450          | F: gtcagtggatctgacgacaccaa<br>R: atgcctgccatccaacctg     | 171bp             |
| <i>Glut1</i>  | solute carrier family 2 member 1                | 20525          | F: cttcattgtgggcatgtcttc<br>R: aggttcggcctttggtctcag     | 134bp             |
| <i>Il1b</i>   | interleukin 1 beta                              | 16176          | F: gcaactgttctgaactcaact<br>R: atcttttgggtccgtcaact      | 89bp              |
| <i>Il6</i>    | interleukin 6                                   | 16193          | F: ccacttcacaagtcggaggetta<br>R: gcaagtgcacatcgtgttcatac | 112bp             |
| <i>Il10</i>   | interleukin 10                                  | 16153          | F: catggcccagaaatcaagga<br>R: ggagaaatc gatgacagcgc      | 91bp              |
| <i>Irs1</i>   | insulin receptor substrate 1                    | 16367          | F: gcgggctgactccaagaac<br>R: gctatccgcggaatgg            | 76bp              |
| <i>Mcp1</i>   | chemokine (C-C motif) ligand 2                  | 20296          | F: ttaacgccccactcacctgctg<br>R: gcttcttgggacacctgctgc    | 106bp             |
| <i>Ppia</i>   | peptidylprolyl isomerase A                      | 268373         | F: ctgagcactggggagaaagga<br>R: gaagtcaccacctggcaca       | 87bp              |
| <i>Tnf</i>    | tumor necrosis factor                           | 21926          | F: catcttctcaaaatcgagtgacaa<br>R: tgggagtagacaaggtacaacc | 175bp             |

F: Forward; R: Reverse; Bp: base pair.

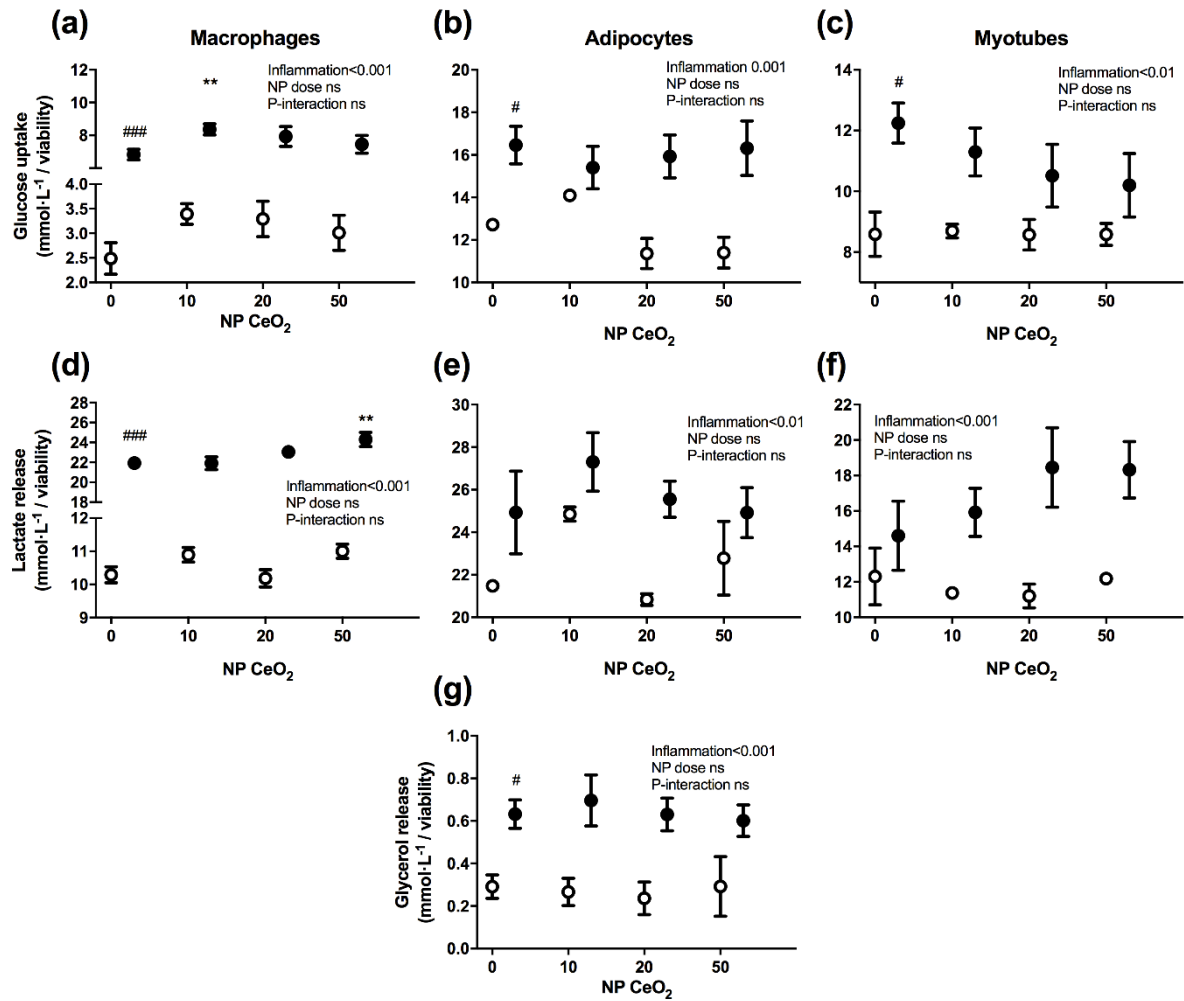

FIGURE S1. Glucose uptake, lactate and glycerol release in RAW 264.7 macrophages (a,d), 3T3-L1 adipocytes (b,e,g) and C2C12 myotubes (c,f) at 24 h after CeO<sub>2</sub> NPs treatment at 10, 20 and 50 μg/ml doses in fold change compared to non-treated control (NTC). White shapes: Control medium; Black shapes: Inflammation in macrophages activated with Lipopolysaccharide (LPS), adipocytes and myotubes treated with conditioned medium (CM); # p<0.05, ### p<0.001 Control vs. Inflammation; \*\* p<0.01 CeO<sub>2</sub> NPs vs. Inflammation; Data (n=6 /group) are expressed as mean (SEM).

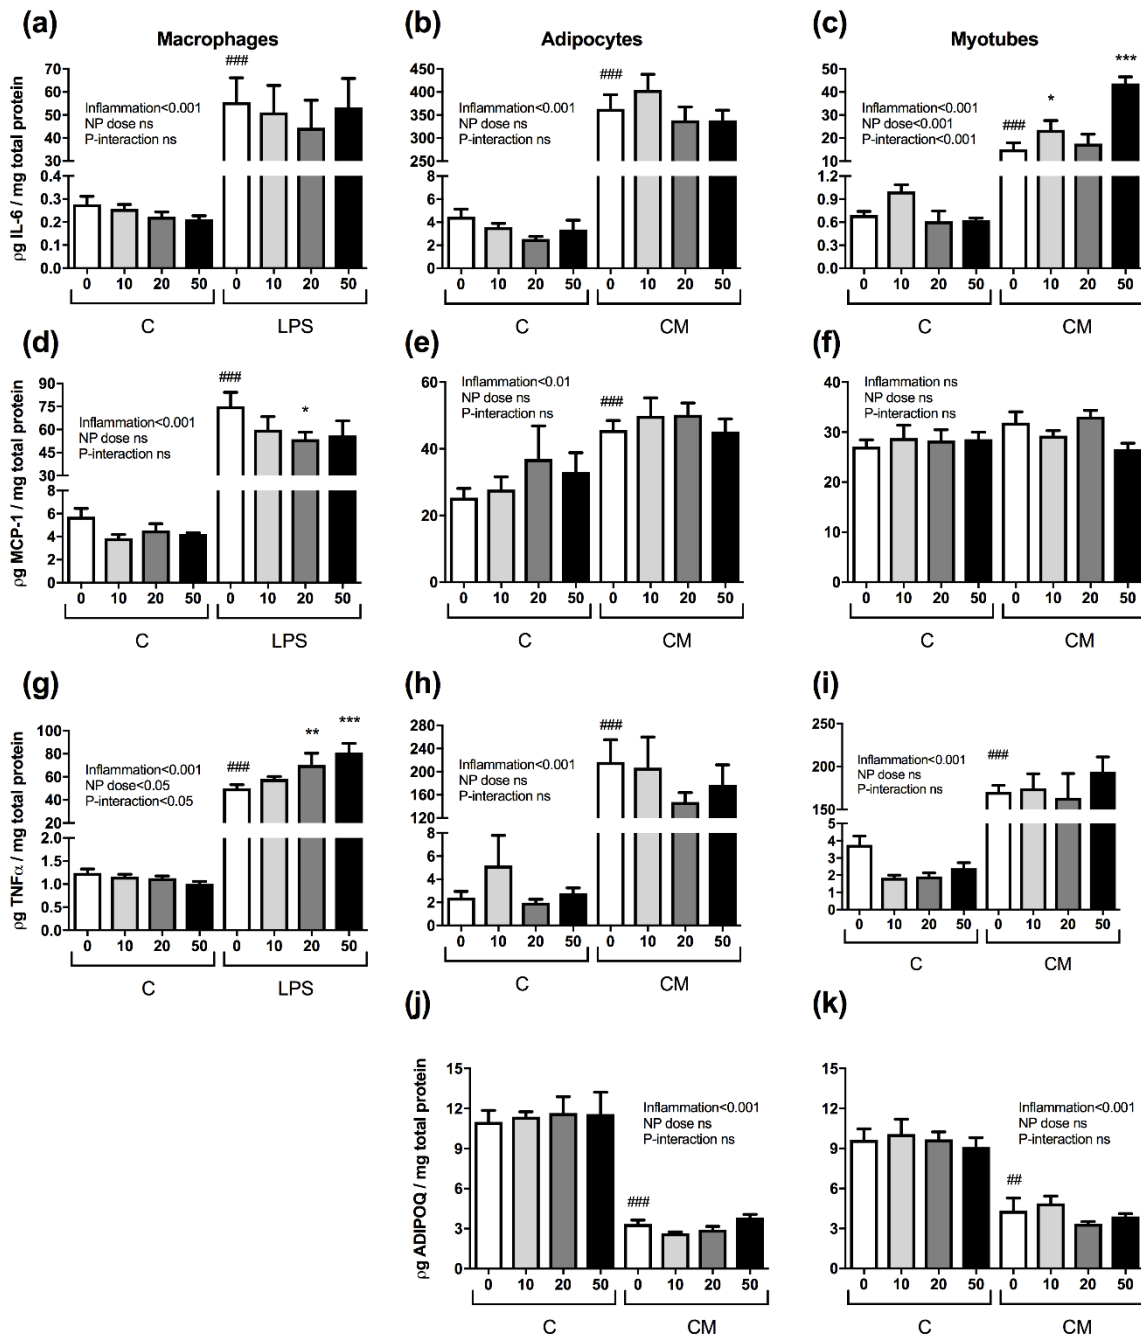

FIGURE S2. Secretion of IL-6, MCP-1, TNF- $\alpha$  and ADIPOQ in RAW 264.7 macrophages (a,d,g), 3T3-L1 adipocytes (b,e,h,j) and C2C12 myotubes (c,f,i,k) at 24 h after CeO<sub>2</sub> NPs treatment at 10, 20 and 50  $\mu$ g/ml doses in  $\mu$ g/mg total protein compared to non-treated control (NP0). C: Control medium; LPS or CM: Inflammation in macrophages activated with Lipopolysaccharide (LPS), adipocytes and myotubes treated with conditioned medium (CM); ## p<0.01, ### p<0.001 Control vs. Inflammation; \* p<0.05, \*\* p<0.01, \*\*\* p<0.001 CeO<sub>2</sub> NPs vs. Inflammation; Data (n=6 /group) are expressed as mean (SEM).

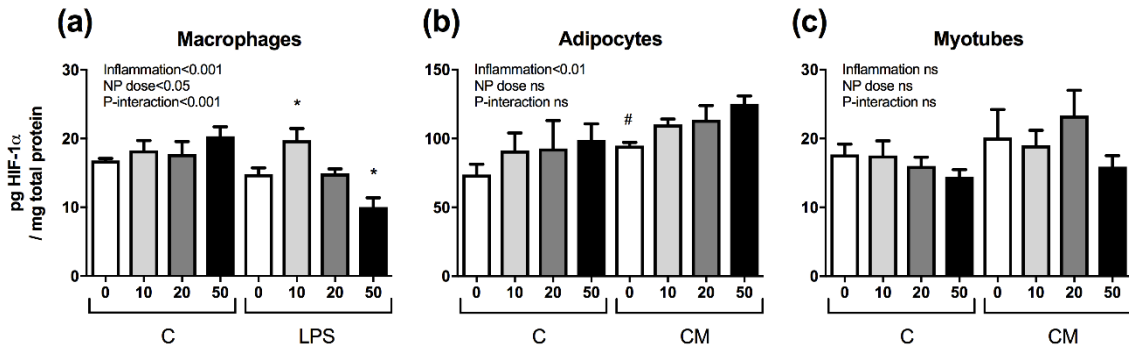

FIGURE S3. HIF-1 $\alpha$  total protein in RAW 264.7 macrophages (a), 3T3-L1 adipocytes (b) and C2C12 myotubes (c) at 24 h after CeO<sub>2</sub> NPs treatment at 10, 20 and 50  $\mu$ g/ml doses in  $\mu$ g/total protein compared to non-treated control (NTC). C: Control medium; LPS or CM: Inflammation in macrophages activated with Lipopolysaccharide (LPS), adipocytes and myotubes treated with conditioned medium (CM); #  $p < 0.05$  Control vs. Inflammation; \*  $p < 0.05$  NPs vs. Inflammation; Data ( $n=6$  /group) are expressed as mean (SEM).

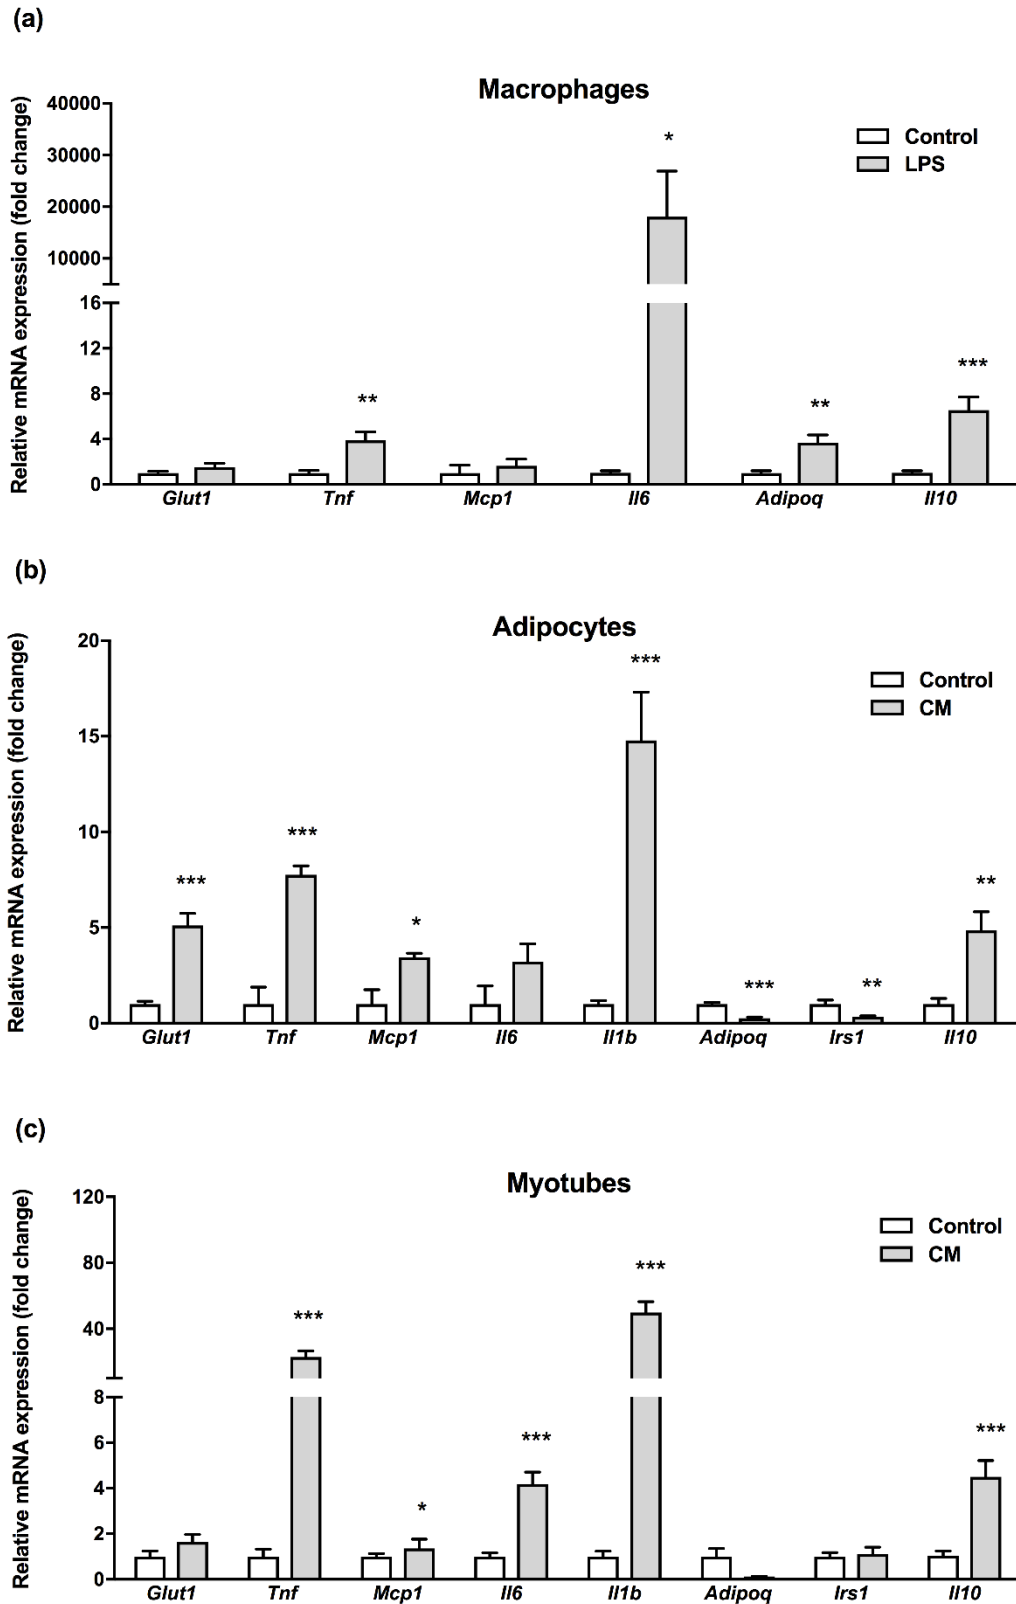

FIGURE S4. Relative mRNA analysis of metabolism-related markers in RAW 264.7 macrophages activated with LPS (a), 3T3-L1 adipocytes (b) and C2C12 myocytes (c) treated with conditioned medium (CM). Results normalized to *Ppia* housekeeping gene. \*  $p < 0.05$ , \*\*  $p < 0.01$ , \*\*\*  $p < 0.001$  Control vs. Inflammation (LPS or CM); Data ( $n = 6$ /group) are expressed as mean (SEM).
